# Supplementary material
Source: publisher figshare collection journal article supplement (https://gsajournals.figshare.com/ndownloader/files/14902562)
Supplement: Supplementary file 1 [file 14902562]

## Sheet: Sheet1
Table S2. Accession numbers for proteins used to estimate Zasp phylogeny. Related to Figure 1B.
NCBI Reference Sequence	Species
NP_001261654.1	Drosophila melanogaster
XP_015017623.1	Drosophila mojavensis
XP_005180976.1	Musca domestica
XP_018793532.1	Bactrocera latifrons
EAT38166.1	Aedes aegypti
XP_001843250.1	Culex pipiens
XP_021204826.1	Bombyx mori
XP_015835605.1	Tribolium castaneum
XP_016769759.1	Apis mellifera
NP_729396.2	Drosophila melanogaster
XP_002007386.2	Drosophila mojavensis
XP_019890185.1	Musca domestica
XP_018801607.1	Bactrocera latifrons
EAT32701.1	Aedes aegypti
XP_001865101.1	Culex pipiens
XP_004926434.1	Bombyx mori
XP_967133.1	Tribolium castaneum
XP_001122389.1	Apis mellifera
NP_001163163.1	Drosophila melanogaster
XP_015018533.1	Drosophila mojavensis
XP_019890157.1	Musca domestica
XP_018788867.1	Bactrocera latifrons
EAT42840.1	Aedes aegypti
XP_001862167.1	Culex pipiens
XP_021203854.1	Bombyx mori
XP_015835999.1	Tribolium castaneum
XP_026299019.1	Apis mellifera
NP_648668.3	Dysc, Drosophila melanogaster
NP_733154.1	Scrib, Drosophila melanogaster
NP_731291.2	Pyd, Drosophila melanogaster
GAWT02065770.1	Empusa pennata
GAWN02047393.1	Galloisiana yuasai
GAZA02097265.1	Haploembia palaui
GAYD02055545.1	Blaberus atropos
GAXA02031255.1	Isonychia bicolor
GAZQ02016240.1	Aretaon asperrimus
GAXB02030891.1	Tanzaniophasma sp.
GAWZ02042524.1	Gryllotalpa sp.
GAYH02029754.1	Conwentzia psociformis
GAYY02037197.1	Acanthocasuarina muellerianae
GAVM02021567.1	Hydroptila sp.
GASE02049131.1	Prorhinotermes simplex
GAUW02029082.1	Apachyus charteceus
GAVB02033562.1	Triodia sylvina
GATG02015225.1	Corydalus cornutus
GAUI02045536.1	Xanthostigma xanthostigma
GASO02041405.1	Tricholepidion gertschi
GASX02040084.1	Folsomia candida
GATH02011625.1	Bittacus pilicornis
GAYO02030410.1	Cordulegaster boltonii
GAXE02039469.1	Acerentomon sp.
GAYV02029293.1	Liposcelis bostrychophila
GAZM02012444.1	Stylops melittae
GAXC02021707.1	Thrips palmi
GAYA02042161.1	Zorotypus caudelli
GAYD02018258.1	Blaberus atropos
GAZG02029060.1	Eurylophella sp.
GAWN02040872.1	Galloisiana yuasai
GAYY02036609.1	Acanthocasuarina muellerianae
GAVB02029897.1	Triodia sylvina
GAWT02063907.1	Empusa pennata
GATH02012075.1	Bittacus pilicornis
GAVV02031093.1	Pseudomallada prasinus
GAYO02028670.1	Cordulegaster boltonii
GAWZ02040222.1	Gryllotalpa sp.
GAZQ02036621.1	Aretaon asperrimus
GAUI02045865.1	Xanthostigma xanthostigma
GAXC02024288.1	Thrips palmi
GAVM02019731.1	Hydroptila sp.
GAXZ02041038.1	Trichocera saltator
GAVM02000440.1	Hydroptila sp.
GAVB02032387.1	Triodia sylvina
GAYV02025649.1	Liposcelis bostrychophila
